# Supplementary material for: The Mycobacterial DNA Methyltransferase HsdM Decreases Intrinsic Isoniazid Susceptibility
Source: MDPI journal article supplement (doi:10.3390/antibiotics10111323), 2021-10-29
Supplement: s1 [file s1]

Supplementary Figure

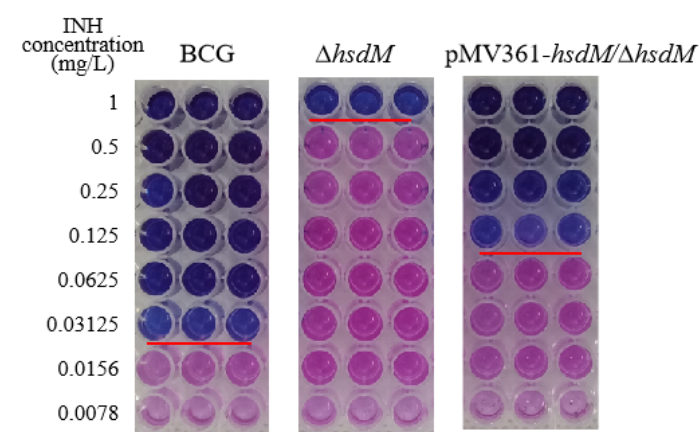

**Figure S1.** The MIC of INH on microplates in BCG,  $\Delta hsdM$  and pMV361- $hsdM/\Delta hsdM$ . Blue wells indicate no growth owing to drug inhibition and pink wells indicate growth.

Supplementary Table

**Table S1. Methylated HsdM substrates: modification sites located in the gene**

In a Separated Excel File.

**Table S2. Methylated HsdM substrates: modification sites located upstream of the gene**

In a Separated Excel File.

**Table S3. HsdM-methylated substrates involved in intermediary metabolism and the respiration pathway**

In a Separated Excel File.

**Table S4. Primers used in this study**

In a Separated Excel File.
